# Supplementary material for: β-Ketoenamine Covalent Organic Frameworks—Effects of Functionalization on Pollutant Adsorption
Source: MDPI journal article supplement (doi:10.3390/polym14153096), 2022-07-29
Supplement: s1 [file s1]

Supplementary Information

# $\beta$ -Ketoenamine Covalent Organic Frameworks – Effects of Functionalization on Pollutant Adsorption

Tiago F. Machado, Filipa A. Santos, Rui F.P. Pereira, Verónica de Zea Bermudez, Artur J.M. Valente\*, M. Elisa Silva Serra and Dina Murtinho

## S1. Adsorption Experiments

Table S1. Statistical parameters for UV-Vis quantification of MB and MO adsorbates.

| Adsorbate | $\lambda_{\max}$ (nm) | b1                  | b0                   | R <sup>2</sup> |
|-----------|-----------------------|---------------------|----------------------|----------------|
| MB        | 664                   | $0.158 \pm 0.003$   | $0.01 \pm 0.01$      | 0.9983         |
| MO        | 463                   | $0.0770 \pm 0.0001$ | $-0.0080 \pm 0.0006$ | 0.9999         |
| Cu(II)    | 325                   | $0.0200 \pm 0.0002$ | $0.014 \pm 0.007$    | 0.9991         |
| Ni(II)    | 232                   | $0.0071 \pm 0.0005$ | $0.09 \pm 0.03$      | 0.9741         |
| Pb(II)    | 217                   | $0.0049 \pm 0.0002$ | $0.03 \pm 0.02$      | 0.9897         |
| Cd(II)    | 228                   | $0.028 \pm 0.002$   | $0.050 \pm 0.03$     | 0.9706         |

## S1. Characterization

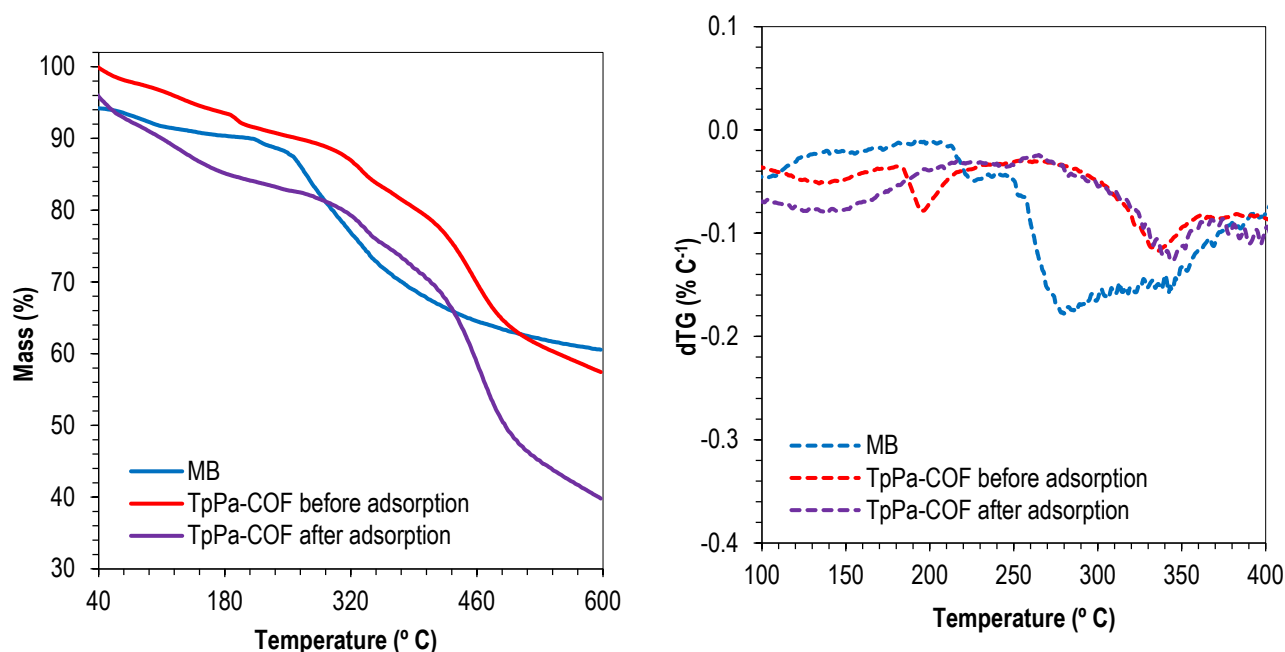

Figure S1. Thermograms (solid) and dTG (dashed) of MB (blue) and TpPa-COF before (red) and after (purple) MB adsorption.

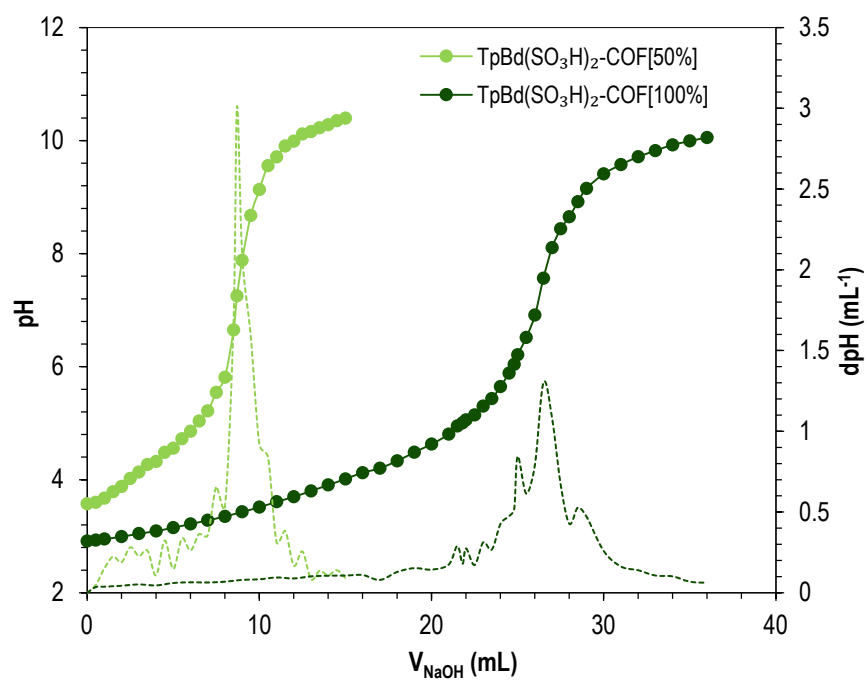

**Figure S2.** pH (solid) and dpH (dashed) during the titration of  $\text{TpBd}(\text{SO}_3\text{H})_2\text{-COF}[50\%]$  (light green) and  $\text{TpBd}(\text{SO}_3\text{H})_2\text{-COF}[100\%]$  (dark green).
